# Supplementary material for: Improving total knee arthroplasty perioperative pain management using a periarticular injection with bupivacaine liposomal suspension
Source: PubMed Central journal article supplement — Arthroplast Today. 2016 Jan 11;2(1):37–42. doi: 10.1016/j.artd.2015.05.005 (PMC4957154; doi:10.1016/j.artd.2015.05.005), 2016-01-11
Supplement: mmc1.pdf [file mmc1.pdf]

# CONFLICT OF INTEREST STATEMENT

## *Arthroplasty Today*

(Adopted from the American Academy of Orthopaedic Surgeons disclosure statement)

The following form **must be filled out completely and submitted by each author (example, 6 authors, 6 forms). If no discloser is required, please write/type "none" at the end of each sentence.**

Manuscript Title: Improving Total Knee Arthroplasty Peri-Operative Pain Management Using a Peri-Articular Injection with Bupivacaine Liposomal Suspension

1. Royalties from a company or supplier (The following conflicts were disclosed) *None*
2. Speakers bureau/paid presentations for a company or supplier (The following conflicts were disclosed)  
*Gives presentations for Smith + Nephew on the Journey BCS II Knee implant system.*
- 3A. Paid employee for a company or supplier (The following conflicts were disclosed) *None*
- 3B. Paid consultant for a company or supplier (The following conflicts were disclosed)  
*Is a paid consultant for Smith + Nephew*
- 3C. Unpaid consultants for a company or supplier (The following conflicts were disclosed) *None*
4. Stock or stock options in a company or supplier (The following conflicts were disclosed) *None*
5. Research support from a company or supplier as a Principal Investigator (The following conflicts were disclosed) *None*
6. Other financial or material support from a company or supplier (The following conflicts were disclosed) *None*
7. Royalties, financial or material support from publishers (The following conflicts were disclosed) *None*
8. Medical/Orthopaedic publications editorial/governing board (The following conflicts were disclosed) *None*
9. Board member/committee appointments for a society (The following conflicts were disclosed) *None*

**Each author must sign AND print or type his/her name, date and submit a separate form**

In addition, one BLINDED Conflict of Interest form (no author names used) should be submitted per manuscript with all author disclosures.

*Margaret Snyder*  
Author Name (Print or Type)

*[Signature]*  
Author Signature

*1-37-15*  
Date

# CONFLICT OF INTEREST STATEMENT

## *Arthroplasty Today*

(Adopted from the American Academy of Orthopaedic Surgeons disclosure statement)

The following form **must be filled out completely and submitted by each author (example, 6 authors, 6 forms). If no discloser is required, please write/type "none" at the end of each sentence.**

Manuscript Title: Improving Total Knee Arthroplasty Peri-Operative Pain Management Using a Peri-Articular Injection with Bupivacaine Liposomal Suspension

1. Royalties from a company or supplier (The following conflicts were disclosed) *None*
2. Speakers bureau/paid presentations for a company or supplier (The following conflicts were disclosed) *None*
- 3A. Paid employee for a company or supplier (The following conflicts were disclosed) *None*
- 3B. Paid consultant for a company or supplier (The following conflicts were disclosed) *None*
- 3C. Unpaid consultants for a company or supplier (The following conflicts were disclosed) *None*
4. Stock or stock options in a company or supplier (The following conflicts were disclosed) *None*
5. Research support from a company or supplier as a Principal Investigator (The following conflicts were disclosed) *None*
6. Other financial or material support from a company or supplier (The following conflicts were disclosed) *None*
7. Royalties, financial or material support from publishers (The following conflicts were disclosed) *None*
8. Medical/Orthopaedic publications editorial/governing board (The following conflicts were disclosed) *None*
9. Board member/committee appointments for a society (The following conflicts were disclosed) *None*

**Each author must sign AND print or type his/her name, date and submit a separate form**

In addition, one BLINDED Conflict of Interest form (no author names used) should be submitted per manuscript with all author disclosures.

*Chris Scheueman*  
Author Name (Print or Type)

*Chris Scheueman*  
Author Signature

*1/27/15*  
Date

# CONFLICT OF INTEREST STATEMENT

## *Arthroplasty Today*

(Adopted from the American Academy of Orthopaedic Surgeons disclosure statement)

The following form **must be filled out completely and submitted by each author (example, 6 authors, 6 forms). If no discloser is required, please write/type "none" at the end of each sentence.**

Manuscript Title: Improving Total Knee Arthroplasty Peri-Operative Pain Management Using a Peri-Articular Injection with Bupivacaine Liposomal Suspension

1. Royalties from a company or supplier (The following conflicts were disclosed) *None*
2. Speakers bureau/paid presentations for a company or supplier (The following conflicts were disclosed) *None*
- 3A. Paid employee for a company or supplier (The following conflicts were disclosed) *None*
- 3B. Paid consultant for a company or supplier (The following conflicts were disclosed) *None*
- 3C. Unpaid consultants for a company or supplier (The following conflicts were disclosed) *None*
4. Stock or stock options in a company or supplier (The following conflicts were disclosed) *None*
5. Research support from a company or supplier as a Principal Investigator (The following conflicts were disclosed) *None*
6. Other financial or material support from a company or supplier (The following conflicts were disclosed) *None*
7. Royalties, financial or material support from publishers (The following conflicts were disclosed) *None*
8. Medical/Orthopaedic publications editorial/governing board (The following conflicts were disclosed) *None*
9. Board member/committee appointments for a society (The following conflicts were disclosed) *None*

**Each author must sign AND print or type his/her name, date and submit a separate form**

In addition, one BLINDED Conflict of Interest form (no author names used) should be submitted per manuscript with all author disclosures.

*CHRISTOPHER J RUNKLE*  
Author Name (Print or Type)

*CJR*  
Author Signature

*1/26/15*  
Date

# CONFLICT OF INTEREST STATEMENT

## *Arthroplasty Today*

(Adopted from the American Academy of Orthopaedic Surgeons disclosure statement)

The following form **must be filled out completely and submitted by each author (example, 6 authors, 6 forms). If no discloser is required, please write/type "none" at the end of each sentence.**

Manuscript Title: Improving Total Knee Arthroplasty Peri-Operative Pain Management Using a Peri-Articular Injection with Bupivacaine Liposomal Suspension

1. Royalties from a company or supplier (The following conflicts were disclosed) *None*
2. Speakers bureau/paid presentations for a company or supplier (The following conflicts were disclosed) *None*
- 3A. Paid employee for a company or supplier (The following conflicts were disclosed) *None*
- 3B. Paid consultant for a company or supplier (The following conflicts were disclosed) *None*
- 3C. Unpaid consultants for a company or supplier (The following conflicts were disclosed) *None*
4. Stock or stock options in a company or supplier (The following conflicts were disclosed) *None*
5. Research support from a company or supplier as a Principal Investigator (The following conflicts were disclosed) *None*
6. Other financial or material support from a company or supplier (The following conflicts were disclosed) *None*
7. Royalties, financial or material support from publishers (The following conflicts were disclosed) *None*
8. Medical/Orthopaedic publications editorial/governing board (The following conflicts were disclosed) *None*
9. Board member/committee appointments for a society (The following conflicts were disclosed) *None*

**Each author must sign AND print or type his/her name, date and submit a separate form**

In addition, one BLINDED Conflict of Interest form (no author names used) should be submitted per manuscript with all author disclosures.

*Kathryn L. Eten*      *Kathryn L. Eten*      *1/27/15*  
\_\_\_\_\_  
Author Name (Print or Type)      Author Signature      Date

# CONFLICT OF INTEREST STATEMENT

## *Arthroplasty Today*

(Adopted from the American Academy of Orthopaedic Surgeons disclosure statement)

The following form **must be filled out completely and submitted by each author (example, 6 authors, 6 forms). If no discloser is required, please write/type "none" at the end of each sentence.**

Manuscript Title: Improving Total Knee Arthroplasty Peri-Operative Pain Management Using a Peri-Articular Injection with Bupivacaine Liposomal Suspension

1. Royalties from a company or supplier (The following conflicts were disclosed) *None*
2. Speakers bureau/paid presentations for a company or supplier (The following conflicts were disclosed) *None*
- 3A. Paid employee for a company or supplier (The following conflicts were disclosed) *None*
- 3B. Paid consultant for a company or supplier (The following conflicts were disclosed) *None*
- 3C. Unpaid consultants for a company or supplier (The following conflicts were disclosed) *None*
4. Stock or stock options in a company or supplier (The following conflicts were disclosed) *None*
5. Research support from a company or supplier as a Principal Investigator (The following conflicts were disclosed) *None*
6. Other financial or material support from a company or supplier (The following conflicts were disclosed) *None*
7. Royalties, financial or material support from publishers (The following conflicts were disclosed) *None*
8. Medical/Orthopaedic publications editorial/governing board (The following conflicts were disclosed) *None*
9. Board member/committee appointments for a society (The following conflicts were disclosed) *None*

**Each author must sign AND print or type his/her name, date and submit a separate form**

In addition, one BLINDED Conflict of Interest form (no author names used) should be submitted per manuscript with all author disclosures.

*Justin Gregg*  
Author Name (Print or Type)

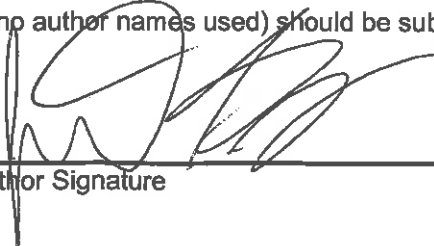  
Author Signature

*1/27/15*  
Date
